# Supplementary material for: Imidazole-2-thiohydantoin conjugates for trace water detection in organic solvents and visual colour recognition for real-time monitoring
Source: Royal Society of Chemistry journal article supplement (doi:10.1039/d5ra09696k), 2026-01-01
Supplement: d5ra09696k1.pdf [file d5ra09696k1.pdf]

**Supporting Information for**

**Imidazole-2-thiohydantoin Conjugates for Trace Water Detection in Organic Solvents and Visual Colour Recognition for Real Time Monitoring**

Bhagwat Giri Goswami<sup>a,b</sup>, Amutha Selvaganesan<sup>a</sup>, Kommineni Kalyani<sup>c</sup>, K.K.R. Datta <sup>a\*</sup>  
Venkatramaiah Nutalapati <sup>a,d\*</sup>

<sup>a</sup>*Department of Chemistry, Faculty of Engineering and Technology, SRM Institute of Science and Technology, SRM Nagar, Kattankulathur, 603203, India.*

<sup>b</sup>*Department of Chemistry, SSSTS RDC Nainidanda Pauri Garhwal 246277, Uttarakhand, India*

<sup>c</sup>*Department of Chemistry, RVR&JC College of Engineering, Guntur, Andhra Pradesh 522019, India*

<sup>d</sup>*Centre for Interdisciplinary Research (CIDR), SRM University-AP, Amaravati, Andhra Pradesh 522 240, India*

***To whom correspondence should be addressed***

*Dr. Venkatramaiah Nutalapati, E-mail: [nvenkat83@gmail.com/venkatramaiah.n@srmap.edu.in](mailto:nvenkat83@gmail.com/venkatramaiah.n@srmap.edu.in)*

## Table of Contents

|                                                                                               |           |
|-----------------------------------------------------------------------------------------------|-----------|
| <b>1. Structural Characterization</b>                                                         | <b>3</b>  |
| <b>2. Thermal Properties</b>                                                                  | <b>6</b>  |
| <b>3. Photophysical Properties</b>                                                            | <b>7</b>  |
| <b>4. Lippert Mataga Plot</b>                                                                 | <b>8</b>  |
| <b>5. Fluorescence lifetime decay profile in different solvents</b>                           | <b>9</b>  |
| <b>6. Role of Viscosity</b>                                                                   | <b>9</b>  |
| <b>7. Fluorescence lifetime of probes in different solvent with increasing water fraction</b> | <b>10</b> |
| <b>8. LOD calculations on Im-2TH and Di-OMeIm-2TH in different solvents</b>                   | <b>11</b> |
| <b>9. Table S1: Details about the reported fluorescent sensor for trace water detection</b>   | <b>12</b> |
| <b>10. AIEE Study of Im-2TH</b>                                                               | <b>14</b> |
| <b>11. AIEE Study of Di-OMeIm-2TH</b>                                                         | <b>14</b> |
| <b>12. HR-SEM Analysis of Im-2TH in ACN &amp; ACN-water</b>                                   | <b>15</b> |
| <b>13. HR-SEM Analysis of Di-OMeIm-2TH in THF &amp; THF-water</b>                             | <b>15</b> |
| <b>14. HR-SEM Analysis of Di-OMeIm-2TH in ACN &amp; ACN-water</b>                             | <b>16</b> |
| <b>15. Emission Spectra of Di-OMeIm-2TH with real samples</b>                                 | <b>16</b> |
| <b>16. RGB Color array in DMSO</b>                                                            | <b>17</b> |
| <b>17. Im-2TH based Test strips for water sensing</b>                                         | <b>17</b> |
| <b>18. References</b>                                                                         | <b>18</b> |

## 1. Structural Characterization

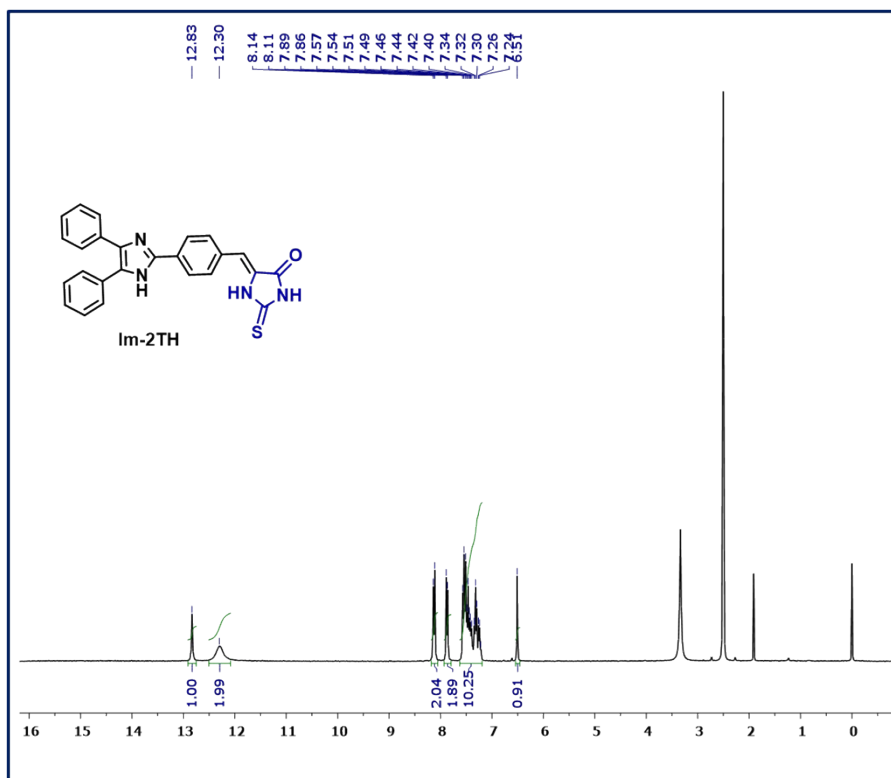

Fig. S1 <sup>1</sup>H NMR (500MHz) of **Im-2TH** in DMSO-*d*<sub>6</sub>.

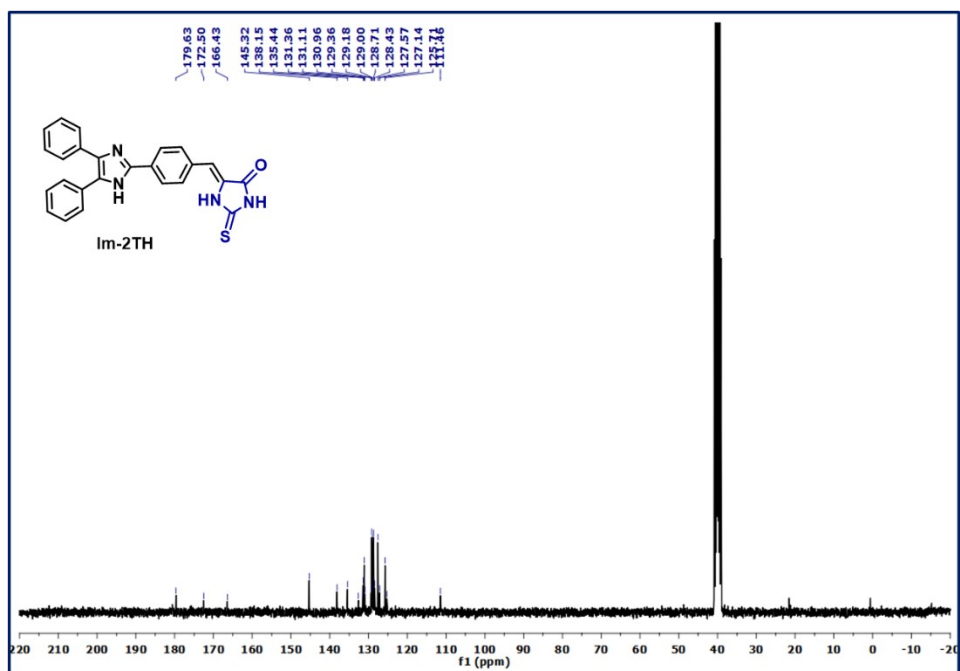

Fig. S2 <sup>13</sup>C NMR (125 MHz) of **Im-2TH** in DMSO-*d*<sub>6</sub>.

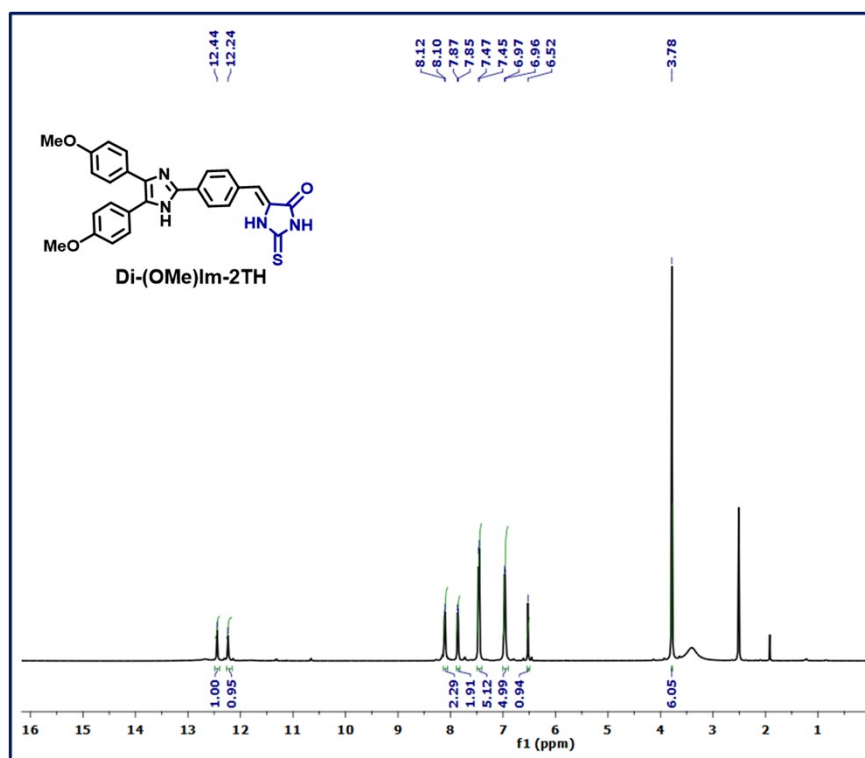

Fig. S3  $^1\text{H}$  NMR (500MHz) of Di-OMeIm-2TH in  $\text{DMSO}-d_6$ .

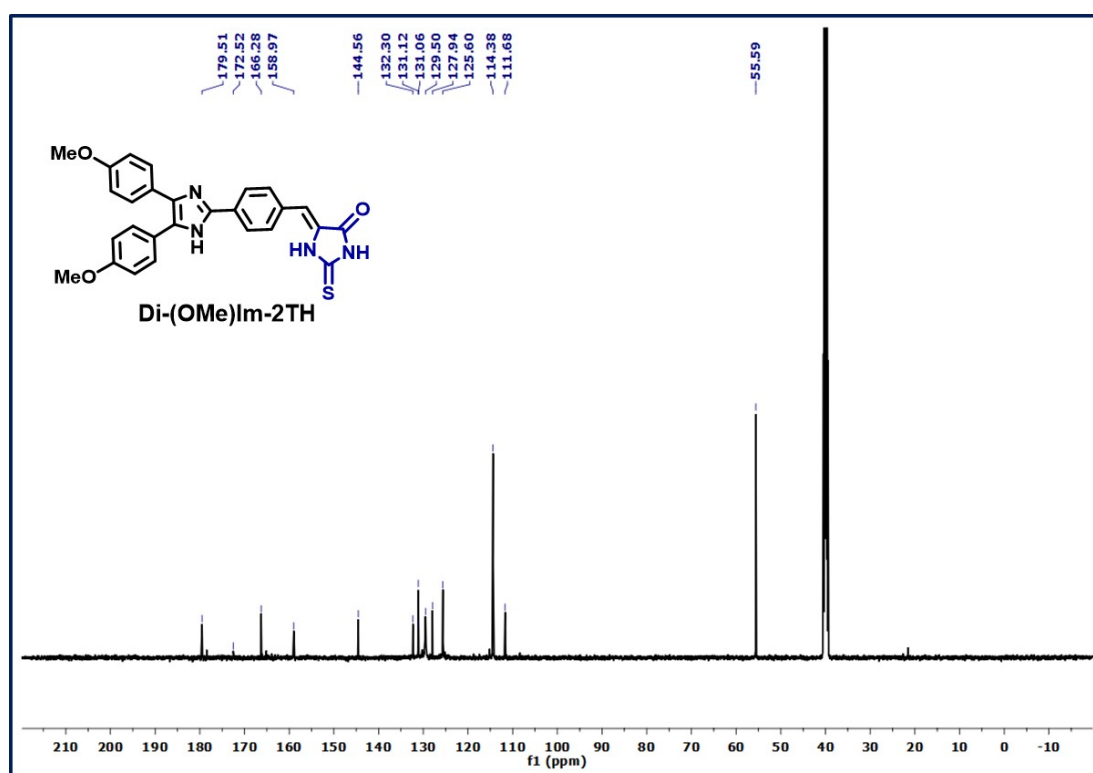

Fig. S4  $^{13}\text{C}$  NMR (125 MHz) of Di-OMeIm-2TH in  $\text{DMSO}-d_6$ .

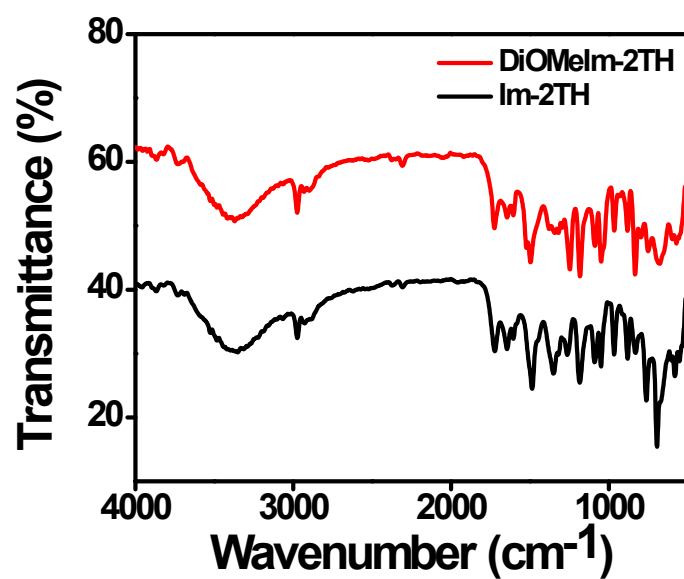

Fig. S5 FTIR spectra of Im-2TH and DiOMeIm-2TH.

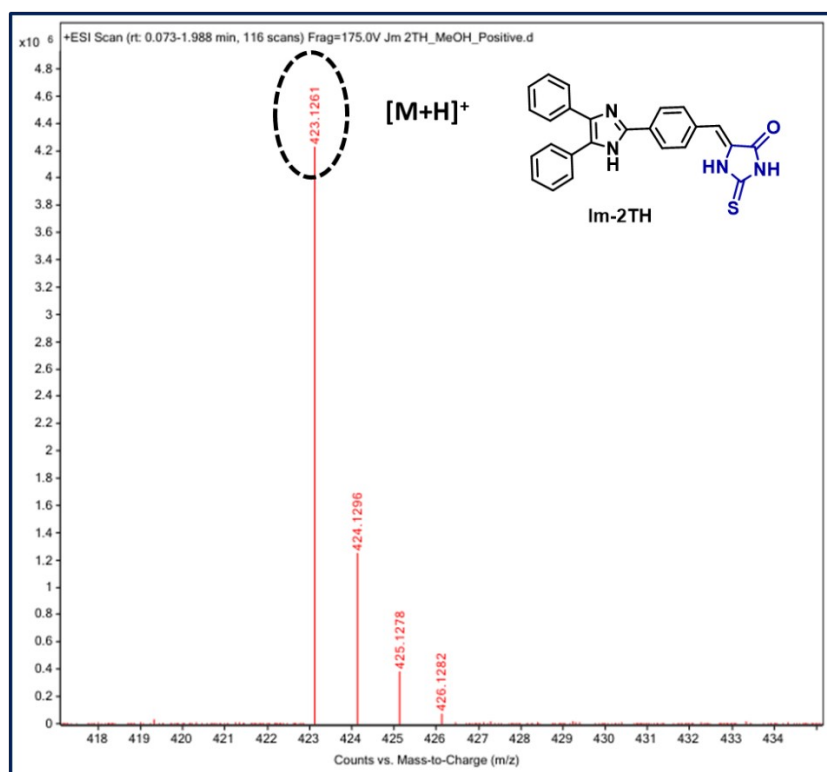

Fig. S6 Mass spectrum of Im-2TH.

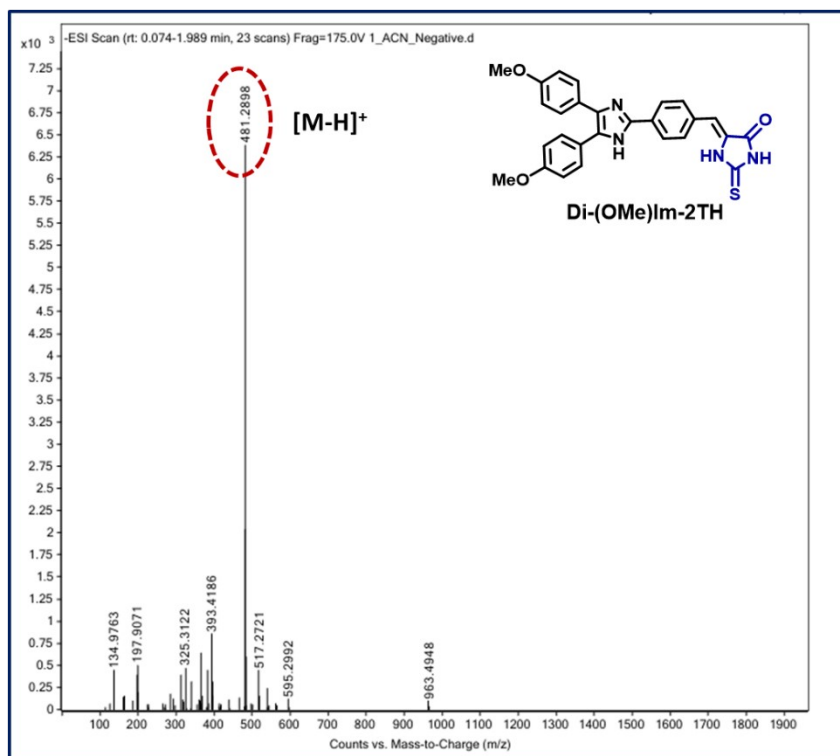

Fig. S7 Mass spectrum of Di-OMeIm-2TH.

## 2. Thermal Properties

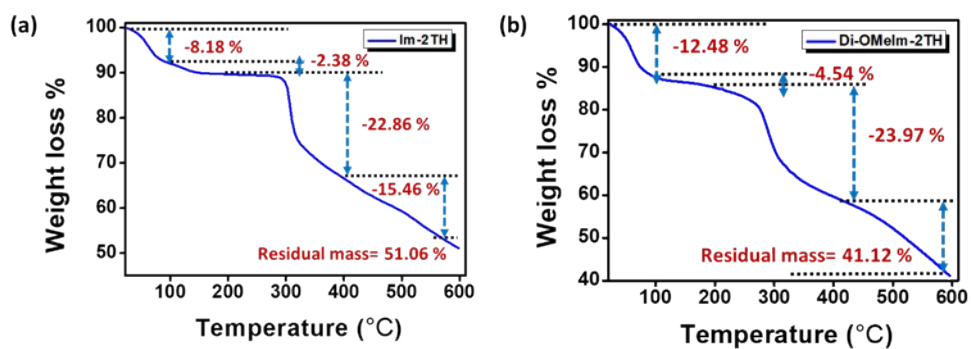

Fig S8. TGA profile of (a) Im-2TH and Di-OMeIm-2TH.

### 3. Photophysical Properties

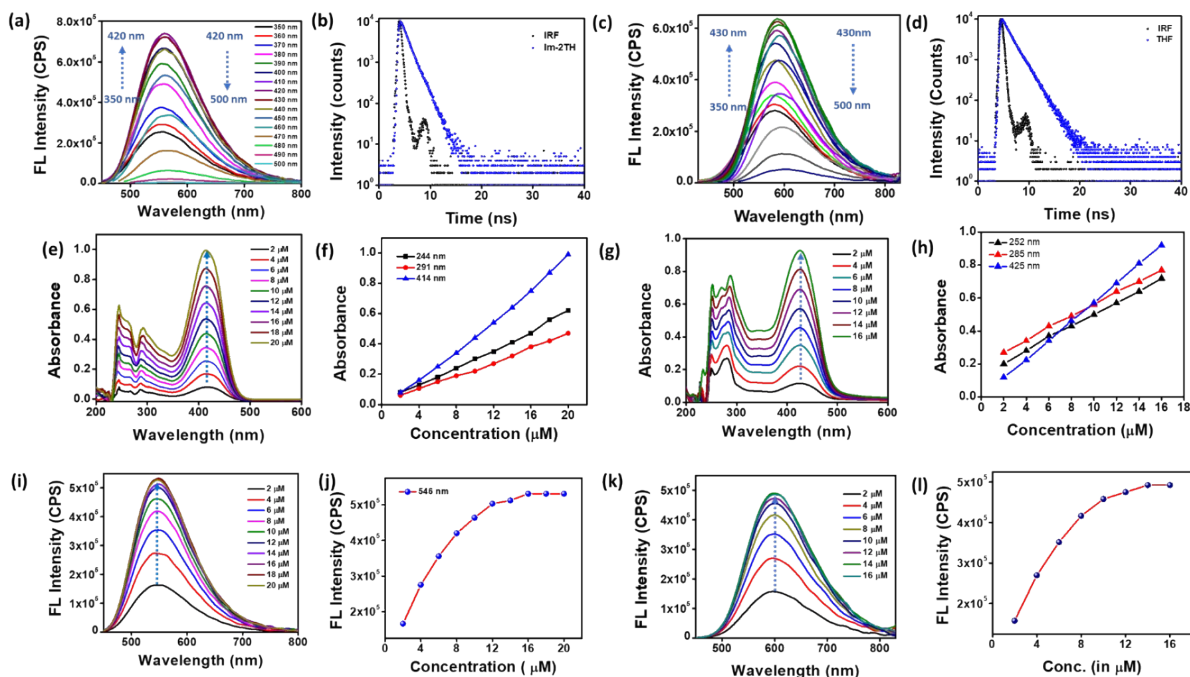

**Fig. S9** Excitation dependent emission spectra and fluorescence lifetime decay of **Im-2TH** (a, b) and **Di-OMeIm-2TH** in THF (c, d). Concentration-dependent absorption spectra of **Im-2TH** (10  $\mu$ M) in THF and variation in absorption intensity at 244, 291 and 414 nm (e, f). Concentration-dependent emission spectra of **Im-2TH** (10  $\mu$ M) in THF and variation in emission intensity at 550 nm (g, h). Concentration-dependent absorption spectra of **Di-OMeIm-2TH** (10  $\mu$ M) in THF and variation in absorption intensity at 252, 285 and 425 nm (i, j). Concentration-dependent emission spectra of **Di-OMeIm-2TH** (10  $\mu$ M) in THF and variation in emission intensity at 585 nm (k, l).

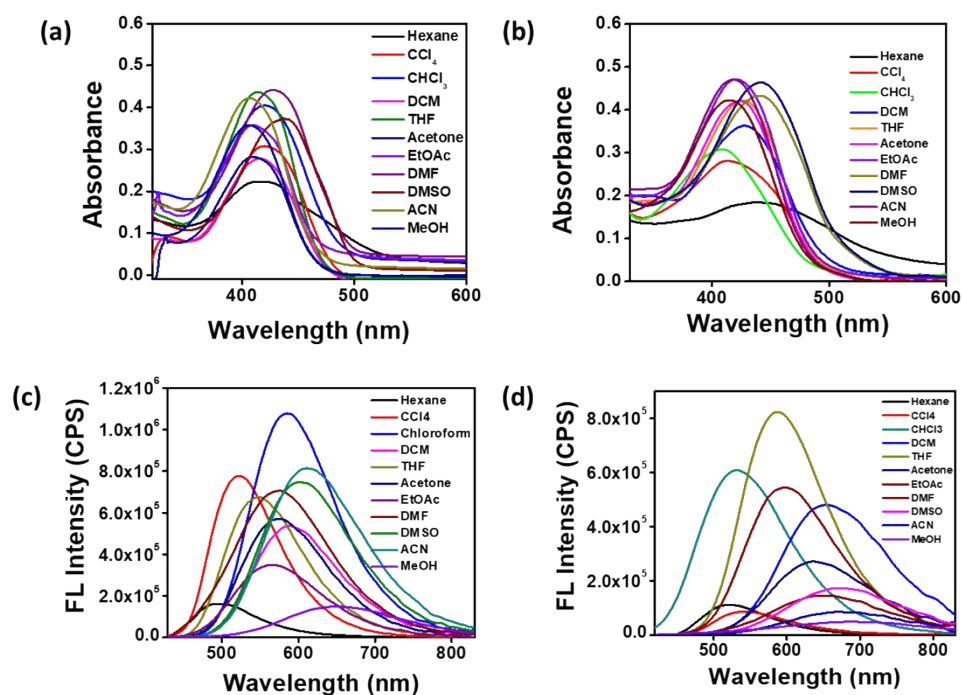

**Fig. S10** Absorption spectra (a, b) and emission spectra (c, d) of Im-2TH and DiOMeIm-2TH in different solvents.

#### 4. Lippert Mataga Plot

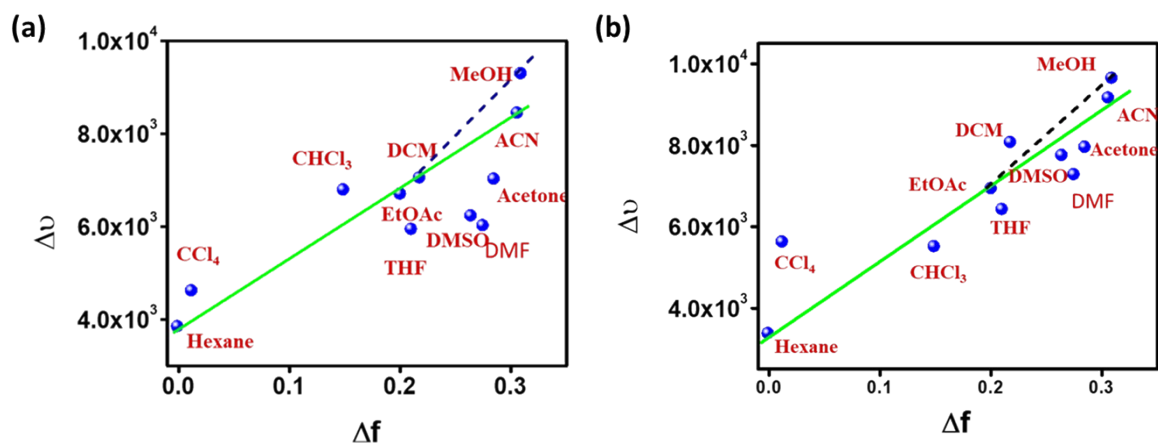

**Fig. S11** Lippert-Mataga plot of Im-2TH (a) and Di-OMeIm-2TH (b) in various solvent with different polarities.



## 5. Fluorescence lifetime decay profile in different solvents

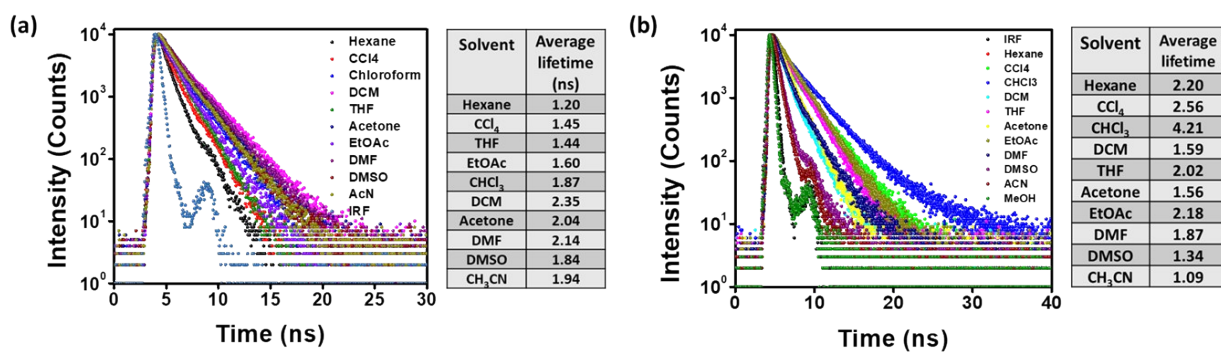

**Fig. S12** Fluorescence lifetime decay of **Im-2TH** (a) and **DiOMeIm-2TH** (b) in different solvents.

## 6. Role of Viscosity

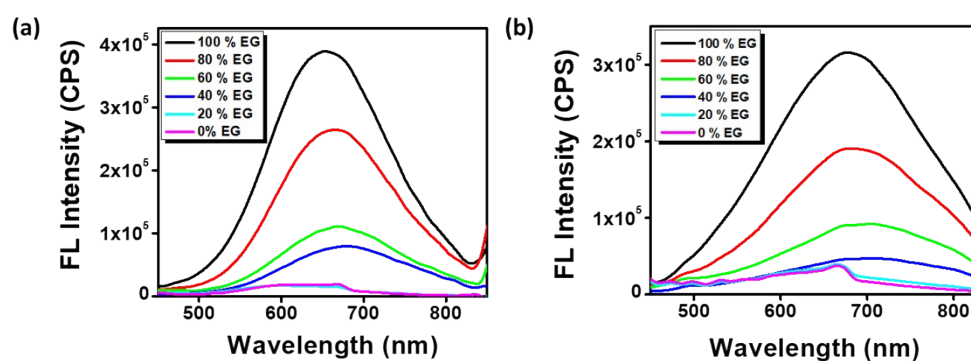

**Fig. S13** Change in the fluorescence spectra of **Im-2TH** (a) and **Di-OMeIm-2TH** (b) in different viscosity regions.

## 7. Fluorescence lifetime of probes in different solvent with increasing water fraction

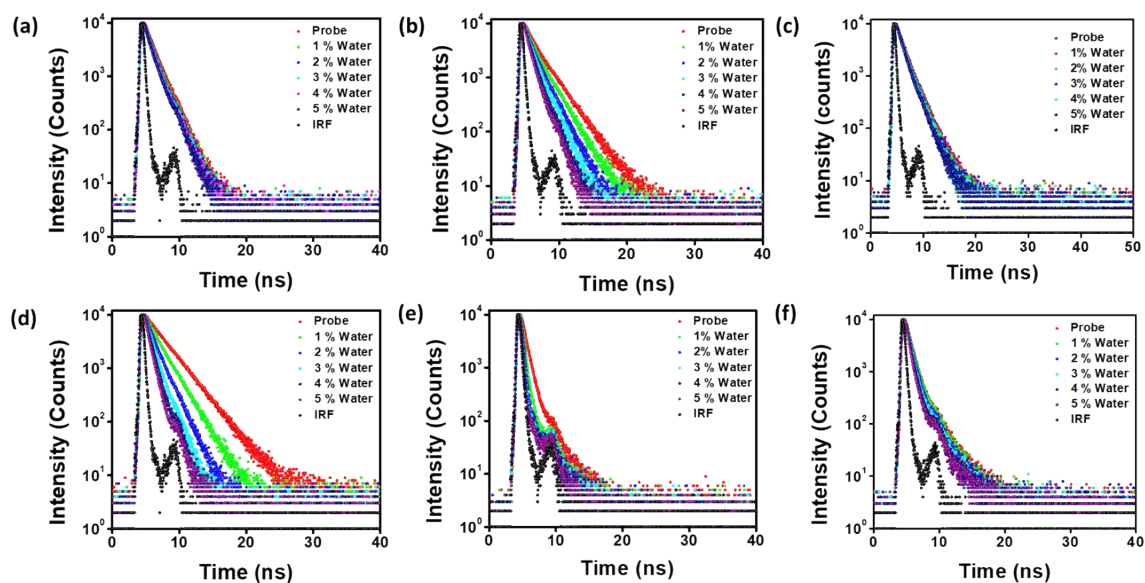

| Water fraction<br>(% v/v) | Average lifetime of Im-2TH (in ns) |      |      |
|---------------------------|------------------------------------|------|------|
|                           | THF                                | ACN  | DMSO |
| 0                         | 1.49                               | 2.35 | 1.75 |
| 1                         | 1.42                               | 1.97 | 1.73 |
| 2                         | 1.43                               | 1.65 | 1.69 |
| 3                         | 1.41                               | 1.44 | 1.66 |
| 4                         | 1.41                               | 1.25 | 1.63 |
| 5                         | 1.35                               | 1.14 | 1.60 |

| Water fraction<br>(% v/v) | Average lifetime of Di-OMeIm-2TH (in ns) |      |      |
|---------------------------|------------------------------------------|------|------|
|                           | THF                                      | ACN  | DMSO |
| 0                         | 2.73                                     | 1.35 | 1.60 |
| 1                         | 2.01                                     | 1.46 | 1.52 |
| 2                         | 1.54                                     | 1.83 | 1.50 |
| 3                         | 1.25                                     | 1.87 | 1.47 |
| 4                         | 1.10                                     | 1.85 | 1.46 |
| 5                         | 1.05                                     | 1.66 | 1.49 |

**Fig. S14** A plot of fluorescence lifetime changes against varied concentrations of H<sub>2</sub>O (0-5 %) in (a) THF (b) ACN and (c) DMSO for of **Im-2TH** (10 μM) and **Di-OMeIm-2TH** (10 μM) with varied concentrations of H<sub>2</sub>O (0- 5 %) in (d) THF (e) ACN & (f) DMSO.

## 8. LOD calculations on Im-2TH and Di-OMeIm-2TH in different solvents

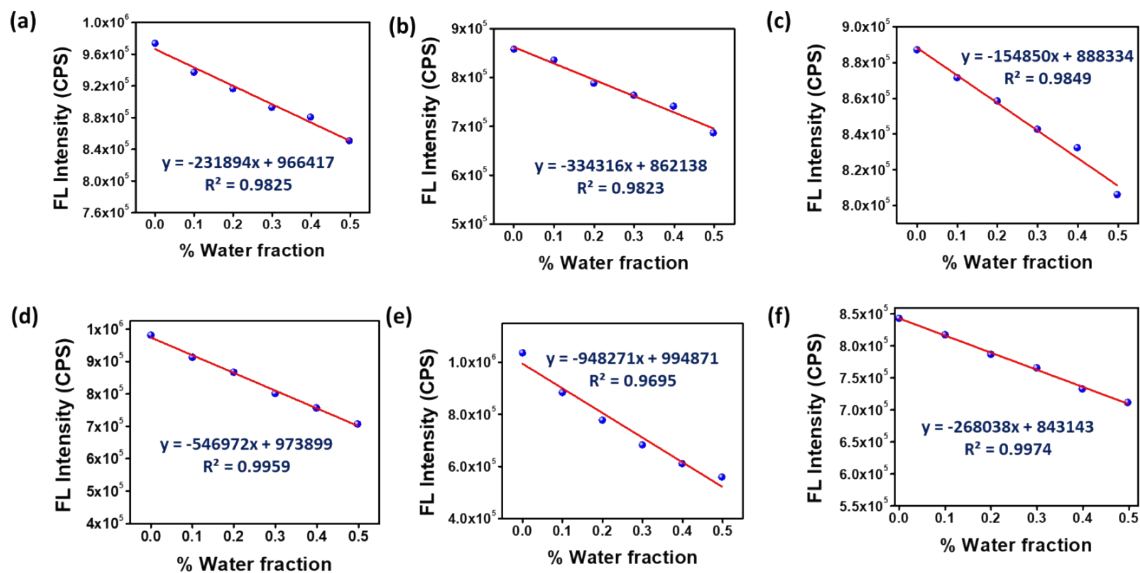

**Fig. S15** A plot of fluorescence intensity changes against varied concentrations of H<sub>2</sub>O (0-0.49 %) in (a) THF (b) ACN and (c) DMSO for of **Im-2TH** (10  $\mu$ M) and **Di-OMeIm-2TH** (10  $\mu$ M) with varied concentrations of H<sub>2</sub>O (0-0.49 %) in (d) THF (e) ACN & (f) DMSO.

9. Table S1: Details about the reported fluorescent sensor for trace water detection.

| Sr. No | Probe                                                                               | LOD                                                       | Solvent used                                                         | Sensing mode | Self-Assembly                               | RGB Analysis                  | Ref. |
|--------|-------------------------------------------------------------------------------------|-----------------------------------------------------------|----------------------------------------------------------------------|--------------|---------------------------------------------|-------------------------------|------|
| 1.     | 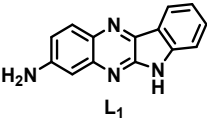   | 0.018%,<br>0.027%,<br>0.012%,<br>and 0.43%                | CH <sub>3</sub> CN,<br>THF, DMF,<br>and<br>CH <sub>3</sub> OH        | Turn-off     | Yes, but<br>not in a<br>detailed<br>manner. | Yes, in<br>coated<br>surfaces | 1    |
| 2.     |    | 0.03 (wt. %)                                              | THF                                                                  | Turn-off     | Yes                                         | No                            | 2    |
| 3      |   | 0.00302,<br>0.033,<br>0.052, and<br>0.448 (wt. %)         | THF,<br>CH <sub>3</sub> OH,<br>acetone,<br>and<br>CH <sub>3</sub> CN | Turn-On      | No                                          | No                            | 3    |
| 4      |  | 0.0041%<br>w/w,<br>0.0144%<br>w/w and<br>0.1008%<br>w/w). | THF,<br>acetone and<br>CH <sub>3</sub> CN                            | Turn-off     | No                                          | No                            | 4    |
| 5      |  | 0.028%,<br>0.013%,<br>0.021%,<br>and<br>0.045%            | THF,<br>CH <sub>3</sub> CN,<br>acetone,<br>and<br>DMF                | Turn-off     | No                                          | No                            | 5    |
| 6      |  | 0.0464 v/v,<br>0.0298 v/v,<br>and 0.0017<br>v/v           | THF,<br>CH <sub>3</sub> CN<br>and MeOH                               | Turn-On      | No                                          | No                            | 6    |

|   |                                                                                                         |                                              |                                        |                 |     |     |                             |
|---|---------------------------------------------------------------------------------------------------------|----------------------------------------------|----------------------------------------|-----------------|-----|-----|-----------------------------|
| 7 | 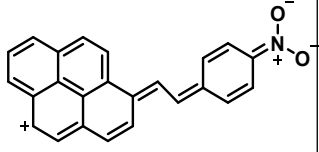                       | 0.007%,<br>0.033%,<br>and<br>0.036%<br>(v/v) | THF, DMF,<br>and<br>CH <sub>3</sub> CN | <i>Turn-off</i> | No  | No  | 7                           |
| 8 |                        | 35 ppm, 36<br>ppm and 60<br>ppm              | Dioxane,<br>THF,<br>DMF                | <i>Turn-off</i> | No  | No  | 8                           |
| 9 |  <p>Di-(OMe)Im-2TH</p> | 0.060 ppm,<br>0.034 ppm,<br>and 0.124<br>ppm | THF, ACN,<br>DMSO                      | Turn-off        | Yes | Yes | Pre<br>sen<br>t<br>wor<br>k |

## 10. AIEE Study of Im-2TH

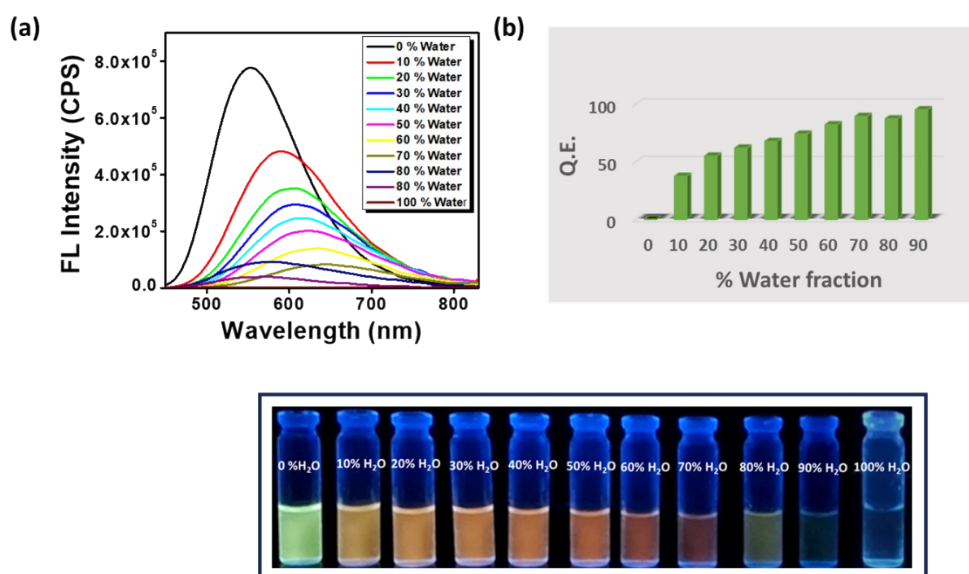

**Fig. S16** Variation in emission spectra of **Im-2TH** with at different  $f_w$  in THF-Water ratio (a). Quenching efficiency of **Im-2TH** at different water fraction (b). Photograph of **Im-2TH** at different water fraction under the illumination of 365 nm light (c).

## 11. AIEE Study of Di-OMeIm-2TH

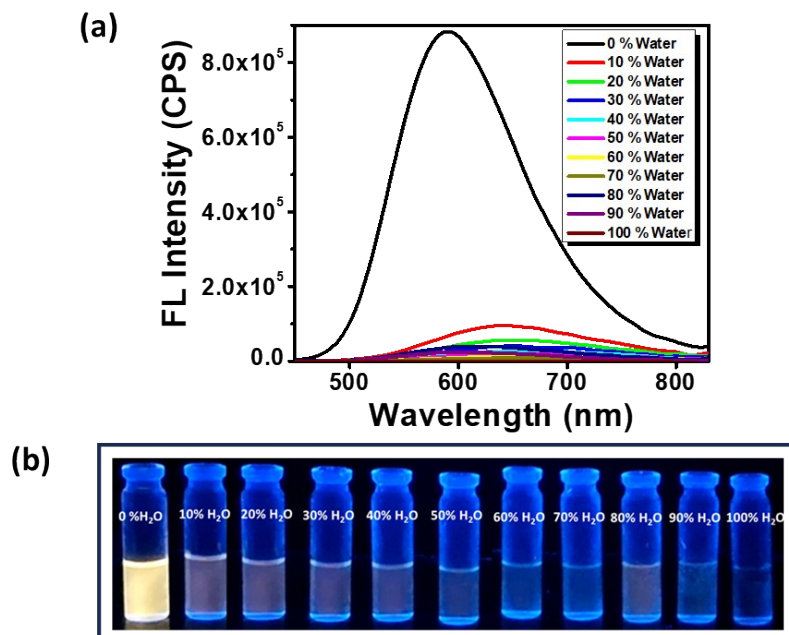

**Fig. S17** Variation in emission spectra of **Di-OMeIm-2TH** with at different  $f_w$  in THF-Water ratio (a). Photograph of **Di-OMeIm-2TH** at different water fraction under the illumination of 365 nm light (b).

## 12. HR-SEM Analysis of Im-2TH in ACN & ACN-water

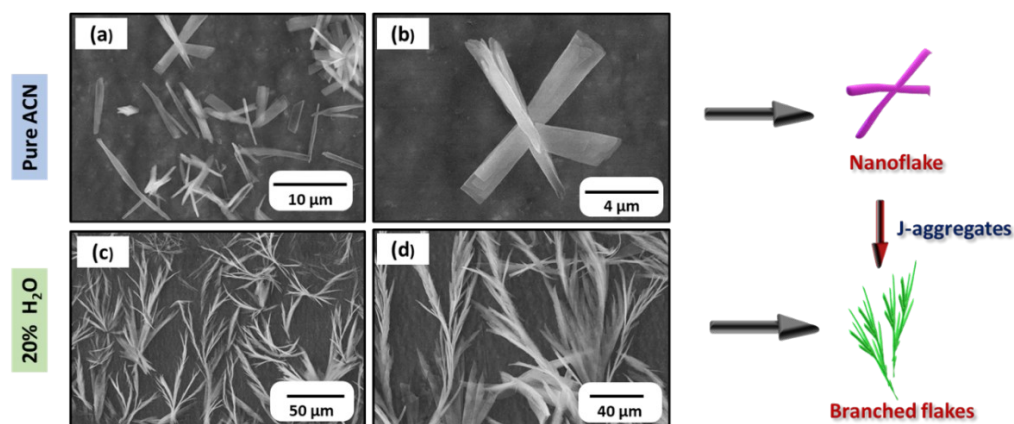

**Fig. S18** HR-SEM images of different self-assembled structures formed by **Im-2TH** in different water fractions **(a, b)**  $f_w=0\%$ , **(c, d)**  $f_w=20\%$ .

## 13. HR-SEM Analysis of Di-OMeIm-2TH in THF & THF-water

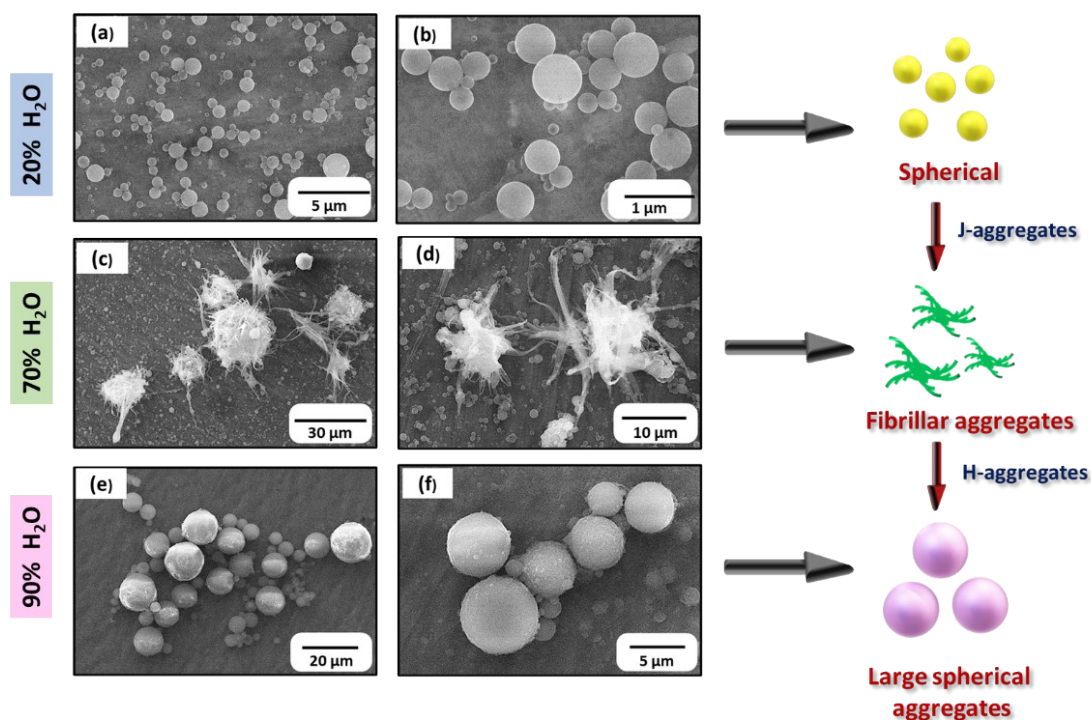

**Fig. S19** HR-SEM images of different self-assembled structures formed by **Di-OMeIm-2TH** in different water fractions **(a, b)**  $f_w=20\%$ , **(c, d)**  $f_w=70\%$  & **(e, f)**  $f_w=90\%$ .



#### 14. HR-SEM Analysis of Di-OMeIm-2TH in ACN & ACN-water

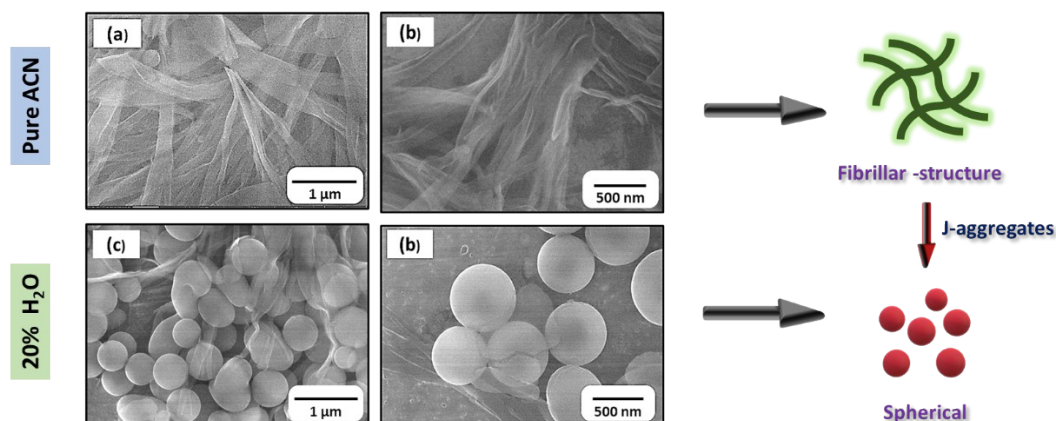

**Fig. S20** HR-SEM images of different self-assembled structures formed by **Di-OMeIm-2TH** in different water fractions (a, b)  $f_w=0$  %, (c, d)  $f_w=20$  %.

#### 15. Emission Spectra of Di-OMeIm-2TH with real samples

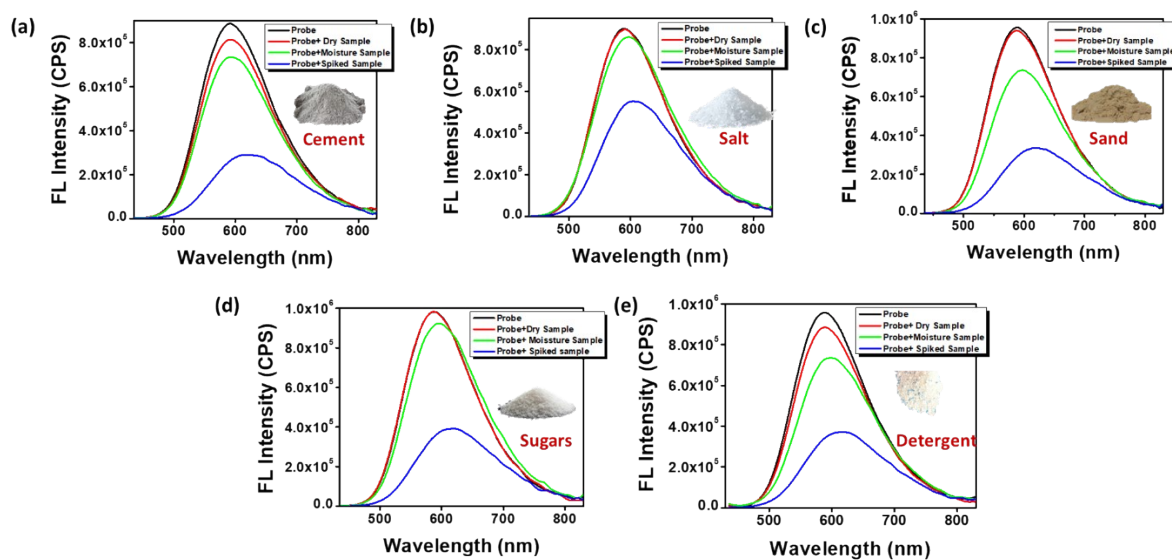

**Fig. S21** Variation in the emission intensity of **Di-OMeIm-2TH** (10 μm, THF) in the presence of different commercial products (a) cement (b) Salt (c) sand (d) sugar and (e) detergent.



## 16. RGB Color array in DMSO

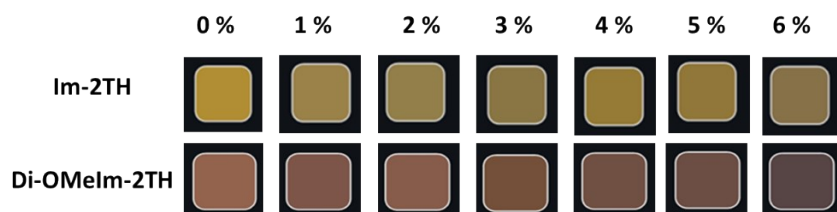

**Fig. S22** RGB Color array for **Im-2TH** and **Di-OMeIm-2TH** in DMSO on addition of 0-6% trace water.

## 17. Im-2TH based Test strips for water sensing

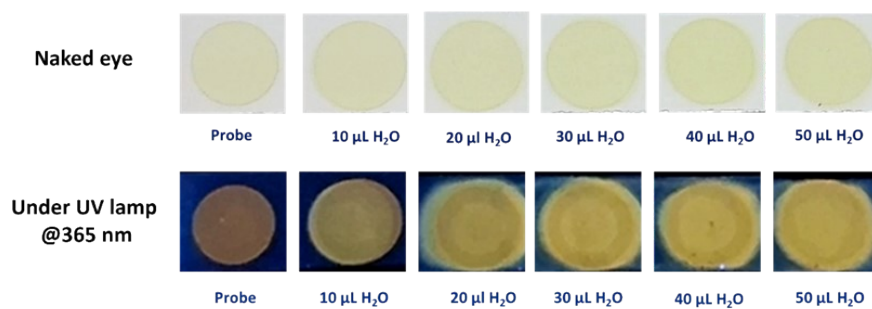

**Fig. S23** Im-2TH coated test strips for water detection

## 18. References

- 1 M. Basak and G. Das, Amine-incorporated quinoxaline based fluorescent sensor for detection of trace water: Solvent influenced self-assembly, *Spectrochim Acta A Mol Biomol Spectrosc*, 2022, **280**, 121521.
- 2 M. M. Zafar, R. Yadav, A. Singh, N. Tyagi, A. Samanta and R. K. Mishra, Tetrasubstituted imidazole-based multifunctional fluorophores: trace water detection and lipid droplet (LD) imaging studies, *Chemical Communications*, 2025, **61**, 9091–9094.
- 3 P. Kumar, R. Kaushik, A. Ghosh and A. D. Jose, Detection of moisture by fluorescent OFF-ON sensor in organic solvents and raw food products, *Anal Chem*, 2016, **88**, 11314–11318.
- 4 P. Kumar and D. A. Jose, Naked eye detection of moisture in organic solvents and development of alginate polymer beads and test cassettes as a portable kit, *Anal Chim Acta*, 2020, **1136**, 178–186.
- 5 J. Nootem, C. Sattayanon, S. Namuangruk, P. Rashatasakhon, W. Wattanathana, G. Tumcharern and K. Chansaenpak, Solvatochromic triazaborolopyridinium probes toward ultra-sensitive trace water detection in organic solvents, *Dyes and Pigments*, 2020, **181**, 108554.
- 6 G. Men, G. Zhang, C. Liang, H. Liu, B. Yang, Y. Pan, Z. Wang and S. Jiang, A dual channel optical detector for trace water chemodosimetry and imaging of live cells, *Analyst*, 2013, **138**, 2847–2857.
- 7 M. Noikham, C. Sriwiphasathit, K. Siriwong and T. Vilaivan, Solvatochromic fluorescent styryl pyrene probes for the quantitative determination of water content in organic solvents, *Dyes and Pigments*, 2023, **208**, 110847.
- 8 L. Ding, Z. Zhang, X. Li and J. Su, Highly sensitive determination of low-level water content in organic solvents using novel solvatochromic dyes based on thioxanthone, *Chemical Communications*, 2013, **49**, 7319–7321.
